# Supplementary material for: Towards a Fungal Science That Is Independent of Researchers’ Gender
Source: MDPI journal article supplement (doi:10.3390/jof8070675), 2022-06-28
Supplement: s1 [file s1]

## Supplementary Materials

**Table S1.** The mycological journals

| Title of the serial publication     | Discipline        | Overall | Overall | First | First | Last  | Last  |
|-------------------------------------|-------------------|---------|---------|-------|-------|-------|-------|
|                                     |                   | 2016    | 2022    | 2016  | 2022  | 2016  | 2022  |
| Eukaryotic Cell                     | Cell Biology      | 43%     | 44.4%   | 50%   | 50%   | 27%   | 28%   |
| FEMS Yeast Research                 | Microbiology      | 44.8%   | 45%     | 50.0% | 50%   | 37.3% | 34.7  |
| Fungal Biology                      | Microbiology      | 46.4%   | 45%     | 53.4% | 50%   | 39.7% | 36%   |
| Fungal Genetics and Biology         | Genetics          | 43%     | 41.5%   | 49.2% | 49.7% | 27.3% | 29.9% |
| Medical Mycology                    | Microbiology      | 47.2%   | 48.6%   | 49.1% | 49.8% | 33.3% | 32%   |
| Mycologia                           | Microbiology      | 33.8%   | 33.5%   | 40.4% | 41.6% | 32.2% | 36%   |
| Mycopathologia                      | Microbiology      | 50%     | 49.7%   | 49.8% | 50%   | 38.4% | 39.2% |
| Mycorrhiza                          | Botany            | 48.3%   | 46.1%   |       |       |       |       |
| Mycoses                             | Microbiology      | 48.1%   | 44.4%   | 50%   | 50%   | 28.5% | 19.9% |
| Revista Iberoamericana de Micologia | Microbiology      | 49.7%   | 50%     |       |       |       |       |
| Yeast                               | Microbiology      | 41.2%   | 45.2%   | 49.6% | 49.9% | 33%   | 38.2% |
| Nature                              | Multidisciplinary | 31.4%   | 34.9%   | 28%   | 30.1% | 18.3% | 20.8% |
| Science                             | Multidisciplinary | 30%     | 30.7%   | 31.2% | 31.2% | 21.9% | 23.4% |

Mycology journals according to the Journal Citation Reports for 2016 [1]. Proportion of women authors according to the discipline search in the web app The Gender Gap in Academic Publishing [2]. Additional journal titled Mycological Research was discontinued in 2011; green, 50% or more; blue 40%-60%.

**Table S2.** Proportion of women authors publishing by research discipline

| Discipline        | 2016  | Prediction for 2022 |
|-------------------|-------|---------------------|
| Immunology        | 44.2% | 46%                 |
| Microbiology      | 43.1% | 44.9%               |
| Genetics          | 41.5% | 43.1%               |
| Toxicology        | 41.5% | 44.8                |
| Cell Biology      | 40.9% | 42.9%               |
| Botany            | 38.5% | 41%                 |
| Medicine          | 38.5% | 40.9%               |
| Biotechnology     | 37.9% | 41.9%               |
| Biology           | 37.3% | 39.4%               |
| Multidisciplinary | 37.1% | 40.8%               |
| Biochemistry      | 36.4% | 39.1%               |
| Biophysics        | 33.4% | 33%                 |
| Zoology           | 31%   | 28.9%               |

Proportion as percentage of women authors according to the discipline search in the web app The Gender Gap in Academic Publishing [2].

**Table S3.** Proportion of women researchers publishing by author position in microbiology

| Microbiology | 2016  | Prediction for 2022 |
|--------------|-------|---------------------|
| First        | 51.5% | 50%                 |
| Single       | 38.5% | 44.1%               |
| Overall      | 43.1% | 44.9%               |
| Last         | 32.2% | 36.4%               |

Proportion as percentage of women researchers according to the author position in microbiology the web app The Gender Gap in Academic Publishing [2].

**Table S4.** Proportion of women researchers publishing by author position in mycology

| <b>Mycology</b> | <b>2016</b> | <b>Prediction for 2022</b> |
|-----------------|-------------|----------------------------|
| First           | 49.1%*      | 49%*                       |
| Overall         | 45.1%       | 45%                        |
| Last            | 33%*        | 32.7%*                     |

Proportion as percentage of women researchers according to the author position in microbiology to the web app The Gender Gap in Academic Publishing [2] calculated from the eleven mycological journals (Journal Citation Reports 2016 [1]); \*, data for nine mycological journals.

**Table S5.** Research of fungal aegerolysins as published in scientific journals and disciplines

| <b>Journal</b>                                | <b>Discipline</b>      | <b>Reference</b> |
|-----------------------------------------------|------------------------|------------------|
| BMC Microbiology                              | Microbiology           | [3]              |
| FEMS Microbiology Letters                     | Microbiology           | [4]              |
| Microbiology                                  | Microbiology           | [5]              |
| Molecular Microbiology                        | Microbiology           | [6]              |
| Mycological Research                          | Microbiology           | [7]              |
| Medical Mycology                              | Microbiology/ Mycology | [8,9]            |
| Mycopathologia                                | Microbiology/ Mycology | [10]             |
| Biochemistry                                  | Biochemistry           | [11]             |
| Biochimie                                     | Biochemistry           | [12,13]          |
| Chemistry and Physics of Lipids               | Biochemistry           | [14]             |
| FEBS Letters                                  | Biochemistry           | [15]             |
| Protein science                               | Biochemistry           | [16]             |
| Sub-Cellular Biochemistry                     | Biochemistry           | [17]             |
| Biochimica et Biophysica Acta                 | Biophysics             | [18,19,20]       |
| Applied Microbiology and Biotechnology        | Biotechnology          | [21,22]          |
| Seminars in Cell & Developmental Biology      | Cell biology           | [23]             |
| The FASEB Journal                             | Cell biology           | [24]             |
| International Journal of Medical Microbiology | Medicine               | [25]             |
| International Journal of Medical Sciences     | Medicine               | [26]             |
| Molecular Genetics and Genomics               | Genetics               | [27]             |
| Developmental and Comparative Immunology      | Immunology             | [28]             |
| PloS One                                      | Multidisciplinary      | [29]             |
| Toxicon                                       | Toxicology             | [30]             |
| Journal of Invertebrate Pathology             | Zoology                | [31]             |
| International Journal of Medicinal Mushrooms  | /                      | [32]             |
| Microorganisms                                | /                      | [33]             |
| Mycological Progress                          | /                      | [34]             |
| Scientific Reports                            | /                      | [35,36]          |
| Toxins                                        | /                      | [37,38,39]       |

The research of fungal aegerolysins according to Scopus title-abstract-keywords search (TITLE-ABS-KEY (aegerolysin\*) AND TITLE-ABS-KEY (fung\*)) [40]. Papers found (37) were according to journals assigned to appropriate disciplines by the web app The Gender Gap in Academic Publishing [2].

**Table S6.** Status of women researchers

| <b>Status</b> | <b>Number</b> |
|---------------|---------------|
| Emeritus      | 4             |
| Intermediate  | 90            |
| Senior        | 97            |
| Junior        | 103           |
| Not declared  | 6             |

**Table S7.** Region of women researchers

| <b>Region</b> | <b>Number</b> |
|---------------|---------------|
| Africa        | 6             |
| Asia          | 12            |
| Australia/ NZ | 28            |
| Europe        | 104           |
| North America | 146           |
| South America | 4             |

**Table S8.** Descriptors of fungal research area by women researchers

| <b>Descriptors</b> | <b>Number of descriptor repetition</b> |
|--------------------|----------------------------------------|
| Biochemistry       | 17                                     |
| Biotechnology      | 11                                     |
| Cell biology       | 35                                     |
| Development        | 7                                      |
| Ecology            | 67                                     |
| Evolution          | 89                                     |
| Genetics/Genomics  | 148                                    |
| Immunology         | 5                                      |
| Medical mycology   | 49                                     |
| Plant pathology    | 85                                     |
| Signaling          | 7                                      |
| Taxonomy           | 0                                      |
| Not declared       | 80                                     |

**Table S9.** Keywords women researchers use at least twice to describe their fungal research area

| Keywords                                                                                                                                                                                                                                                                                                                                                                                                                                                                                                                                                                                                                                                                                                                                                                                                                                                                                                | <sup>1</sup> Number of repetitions |
|---------------------------------------------------------------------------------------------------------------------------------------------------------------------------------------------------------------------------------------------------------------------------------------------------------------------------------------------------------------------------------------------------------------------------------------------------------------------------------------------------------------------------------------------------------------------------------------------------------------------------------------------------------------------------------------------------------------------------------------------------------------------------------------------------------------------------------------------------------------------------------------------------------|------------------------------------|
| <b>plant</b>                                                                                                                                                                                                                                                                                                                                                                                                                                                                                                                                                                                                                                                                                                                                                                                                                                                                                            | 60                                 |
| <b>genome</b>                                                                                                                                                                                                                                                                                                                                                                                                                                                                                                                                                                                                                                                                                                                                                                                                                                                                                           | 52                                 |
| <b>interaction</b>                                                                                                                                                                                                                                                                                                                                                                                                                                                                                                                                                                                                                                                                                                                                                                                                                                                                                      | 41                                 |
| <b>evolution</b>                                                                                                                                                                                                                                                                                                                                                                                                                                                                                                                                                                                                                                                                                                                                                                                                                                                                                        | 38                                 |
| <i>Candida</i> , <b>fungi</b> , <b>genetics</b>                                                                                                                                                                                                                                                                                                                                                                                                                                                                                                                                                                                                                                                                                                                                                                                                                                                         | 35                                 |
| <b>fungi</b>                                                                                                                                                                                                                                                                                                                                                                                                                                                                                                                                                                                                                                                                                                                                                                                                                                                                                            | 34                                 |
| <b>ecology</b>                                                                                                                                                                                                                                                                                                                                                                                                                                                                                                                                                                                                                                                                                                                                                                                                                                                                                          | 33                                 |
| <b>pathology</b>                                                                                                                                                                                                                                                                                                                                                                                                                                                                                                                                                                                                                                                                                                                                                                                                                                                                                        | 32                                 |
| <b>population</b>                                                                                                                                                                                                                                                                                                                                                                                                                                                                                                                                                                                                                                                                                                                                                                                                                                                                                       | 27                                 |
| <b>taxonomy</b>                                                                                                                                                                                                                                                                                                                                                                                                                                                                                                                                                                                                                                                                                                                                                                                                                                                                                         | 23                                 |
| <b>microbe</b>                                                                                                                                                                                                                                                                                                                                                                                                                                                                                                                                                                                                                                                                                                                                                                                                                                                                                          | 22                                 |
| <b>pathogen</b>                                                                                                                                                                                                                                                                                                                                                                                                                                                                                                                                                                                                                                                                                                                                                                                                                                                                                         | 20                                 |
| <b>forest</b>                                                                                                                                                                                                                                                                                                                                                                                                                                                                                                                                                                                                                                                                                                                                                                                                                                                                                           | 19                                 |
| <b>biology</b>                                                                                                                                                                                                                                                                                                                                                                                                                                                                                                                                                                                                                                                                                                                                                                                                                                                                                          | 17                                 |
| <i>Cryptococcus</i>                                                                                                                                                                                                                                                                                                                                                                                                                                                                                                                                                                                                                                                                                                                                                                                                                                                                                     | 16                                 |
| <i>Aspergillus</i> , <b>cell</b>                                                                                                                                                                                                                                                                                                                                                                                                                                                                                                                                                                                                                                                                                                                                                                                                                                                                        | 15                                 |
| <b>medicine</b>                                                                                                                                                                                                                                                                                                                                                                                                                                                                                                                                                                                                                                                                                                                                                                                                                                                                                         | 14                                 |
| <b>phylogeny</b>                                                                                                                                                                                                                                                                                                                                                                                                                                                                                                                                                                                                                                                                                                                                                                                                                                                                                        | 13                                 |
| <b>endophyte</b> , <i>Fusarium</i> , <b>oomycetes</b> , <b>systematics</b>                                                                                                                                                                                                                                                                                                                                                                                                                                                                                                                                                                                                                                                                                                                                                                                                                              | 12                                 |
| <b>Disease</b> , <i>Neurospora</i> , <i>Saccharomyces</i>                                                                                                                                                                                                                                                                                                                                                                                                                                                                                                                                                                                                                                                                                                                                                                                                                                               | 11                                 |
| <b>diagnostics</b> , <b>micro</b>                                                                                                                                                                                                                                                                                                                                                                                                                                                                                                                                                                                                                                                                                                                                                                                                                                                                       | 10                                 |
| <b>development</b> , <b>metabolism</b> , <b>mycology</b> , <b>mycorrhizal</b> , <b>rust</b> , <b>signal</b>                                                                                                                                                                                                                                                                                                                                                                                                                                                                                                                                                                                                                                                                                                                                                                                             | 9                                  |
| <b>epidemiology</b> , <b>host</b> , <b>mycorrhiza</b> , <b>soil</b>                                                                                                                                                                                                                                                                                                                                                                                                                                                                                                                                                                                                                                                                                                                                                                                                                                     | 8                                  |
| antifungal, biodiversity, <i>Magnaporthe</i> , secondary, symbiosis                                                                                                                                                                                                                                                                                                                                                                                                                                                                                                                                                                                                                                                                                                                                                                                                                                     | 7                                  |
| phylogenetics, resistance                                                                                                                                                                                                                                                                                                                                                                                                                                                                                                                                                                                                                                                                                                                                                                                                                                                                               | 6                                  |
| <i>Botrytis</i> , chytrid, comparative, enzyme, molecular, tropical, wall, arbuscular, biotechnology, circadian, community, diversity, ectomycorrhizal, immunity, innate, lichen, mycotoxin, <i>Phytophthora</i> , <i>Trichoderma</i> , wood                                                                                                                                                                                                                                                                                                                                                                                                                                                                                                                                                                                                                                                            | 5                                  |
| Ascomycetes, immunology, <i>oryzae</i> , rhythm, factor, epigenetics, metabolite, mating, virulence, Pyrenomyces, metagenomics, type, emerging, invasive, regulation, grass, fungicide, proteomics, speciation, pathologist, stress, med(ical), mycology, mushroom, species, <i>Colletotrichum</i>                                                                                                                                                                                                                                                                                                                                                                                                                                                                                                                                                                                                      | 3                                  |
| <i>albicans</i> , AMF, animal, antibody, Bacteria, bacterial, Basidiomycetes, biogeography, bioinformatics, blast, blight, canker, capsule, <i>Ceratocystis</i> , cereal, change, chromosome, climate, concepts, conservation, crop, cycle, decay, decayers, defense, degrading, drug, dynamics, <i>Epichloe</i> , evolutionary, extremophile, field, functional, generation, genes, glycobiology, <i>Hortaea</i> , human, hybrids, indoor, induced, insect, <i>Leptosphaeria</i> , lignocellulolytic, <i>maculans</i> , management, marine, metapopulations, microbiome, modeling, Mucoromycotina, nitrogen, omics, ornamentals, oxidative, pathogenomics, peptides, <i>Phoma</i> , phylogenomics, physiology, polar, products, <i>Pyrenophora</i> , rice, rot, <i>Septoria</i> , sequencing, small, <i>Sordaria</i> , stem, transduction, tree, <i>Ustilago</i> , vegetable, wild, yeast, Zygomycetes | 2                                  |

The top 10% or top 40 keywords used by Women Researchers in Fungi & Oomycetes (WRIFFO) [41] are listed in bold. Analysis using the online tool Tagul [42]. <sup>1</sup> Number of keyword repetitions in the WRIFFO table[41]. AMF, arbuscular mycorrhiza fungus.

**Table S10.** Gender breakdown of plenary and selected speakers, session chairs, and meeting organizers for two alternating meetings FGC and ECFG

| Conference             | Number of speakers<br>women + men | Number of plenary speakers<br>women + men | Number of chairs<br>women + men | Number of chairs in plenary sessions<br>women + men | Number of organizers<br>women + men |
|------------------------|-----------------------------------|-------------------------------------------|---------------------------------|-----------------------------------------------------|-------------------------------------|
| <b>FGC28<br/>2015</b>  | 101 + 111<br>(?)                  | 8 + 13                                    | 22 + 34                         | 1 + 3                                               | 5 + 10                              |
| <b>ECFG13<br/>2016</b> | 36 + 56                           | 5 + 15                                    | 9 + 20                          | 3 + 9                                               | 14 + 23                             |
| <b>ECFG15<br/>2020</b> | 53 + 57                           | 6 + 14                                    | 10 + 21                         | 2 + 5                                               | 15 + 39                             |
| <b>FGC31<br/>2022</b>  | 102 + 119<br>(?)                  | 10 + 11                                   | 32 + 33                         | 5 + 4                                               | 8 + 8                               |

FGC28, The 28<sup>th</sup> Fungal Genetics Conference at Asilomar, March 17-22, 2015 [43]; ECFG13, The 13<sup>th</sup> European Conference on Fungal Genetics Paris, France, April 3-6, 2016 [44]; ECFG15; The 15<sup>th</sup> European Conference on Fungal Genetics Rome, Italy, February 17-20, 2020 [45]; and FGC31, The 31<sup>st</sup> Fungal Genetics Conference at Asilomar, March 15 - 20, 2022 [46]; ?, unknown gender of the speaker.

## References

- Clarivate analytics Available online: <https://clarivate.com/> (accessed on Nov 30, 2021).
- Holman, L.; Lloyd, E. Gender gap in academic publishing Available online: <https://lukeholman.github.io/genderGap/> (accessed on Nov 30, 2021).
- Pires, A.B.L.; Gramacho, K.P.; Silva, D.C.; Góes-Neto, A.; Silva, M.M.; Muniz-Sobrinho, J.S.; Porto, R.F.; Villela-Dias, C.; Brendel, M.; Cascardo, J.C.M.; et al. Early development of *Moniliophthora perniciosa* basidiomata and developmentally regulated genes. *BMC Microbiol.* **2009**, *9*, 158, doi:10.1186/1471-2180-9-158.
- Miklavič, Š.; Kogovšek, P.; Hodnik, V.; Korošec, J.; Kladnik, A.; Anderluh, G.; Gutierrez-Aguirre, I.; Maček, P.; Butala, M. The *Pseudomonas aeruginosa* RhlR-controlled aegerolysin RahU is a low-affinity rhamnolipid-binding protein. *FEMS Microbiol. Lett.* **2015**, *362*, fnv069–fnv069, doi:10.1093/femsle/fnv069.
- Rao, J.; DiGiandomenico, A.; Unger, J.; Bao, Y.; Polanowska-Grabowska, R.K.; Goldberg, J.B. A novel oxidized low-density lipoprotein-binding protein from *Pseudomonas aeruginosa*. *Microbiology* **2008**, *154*, 654–665, doi:10.1099/mic.0.2007/011429-0.
- Novak, M.; Čepin, U.; Hodnik, V.; Narat, M.; Jamnik, M.; Kraševac, N.; Sepčić, K.; Anderluh, G. Functional studies of aegerolysin and MACPF-like proteins in *Aspergillus niger*. *Mol. Microbiol.* **2019**, *112*, 1253–1269, doi:10.1111/mmi.14360.
- Vidic, I.; Berne, S.; Drobne, D.; Maček, P.; Frangež, R.; Turk, T.; Štrus, J.; Sepčić, K. Temporal and spatial expression of ostreolysin during development of the oyster mushroom (*Pleurotus ostreatus*). *Mycol. Res.* **2005**, *109*, 377–382, doi:10.1017/S0953756204002187.
- Maličev, E.; Chowdhury, H.H.; Maček, P.; Sepčić, K. Effect of ostreolysin, an Asp-hemolysin isoform, on human chondrocytes and osteoblasts, and possible role of Asp-hemolysin in pathogenesis. *Med. Mycol.* **2007**, *45*, 123–130, doi:10.1080/13693780601039615.
- Nayak, A.P.; Green, B.J.; Beezhold, D.H. Fungal hemolysins. *Med. Mycol.* **2013**, *51*, 1–16, doi:10.3109/13693786.2012.698025.
- Nayak, A.P.; Blachere, F.M.; Hettick, J.M.; Lukomski, S.; Schmechel, D.; Beezhold, D.H. Characterization of recombinant terrelysin, a hemolysin of *Aspergillus terreus*. *Mycopathologia* **2011**, *171*, 23–34, doi:10.1007/s11046-010-9343-0.
- Berne, S.; Sepčić, K.; Anderluh, G.; Turk, T.; Maček, P.; Poklar Ulrih, N.N.; Sepčić, K.; Anderluh, G.; Turk, T.; Macek, P.; et al. Effect of pH on the pore forming activity and conformational stability of ostreolysin, a lipid raft-binding protein from the edible mushroom *Pleurotus ostreatus*. *Biochemistry* **2005**, *44*, 11137–47, doi:10.1021/bi051013y.
- Hullin-Matsuda, F.; Makino, A.; Murate, M.; Kobayashi, T. Probing phosphoethanolamine-containing lipids in membranes with duramycin/cinnamycin and aegerolysin proteins. *Biochimie* **2016**, *130*, 81–90, doi:10.1016/j.biochi.2016.09.020.
- Ota, K.; Leonardi, A.; Mikelj, M.; Skočaj, M.; Wohlschlager, T.; Künzler, M.; Aebi, M.; Narat, M.; Križaj, I.; Anderluh, G.; et al. Membrane cholesterol and sphingomyelin, and ostreolysin A are obligatory for pore-formation by a MACPF/CDC-like pore-forming protein, pleurotolysin B. *Biochimie* **2013**, *95*, 1855–1864, doi:10.1016/j.biochi.2013.06.012.
- Hullin-Matsuda, F.; Murate, M.; Kobayashi, T. Protein probes to visualize sphingomyelin and ceramide

- phosphoethanolamine. *Chem. Phys. Lipids* **2018**, *216*, 132–141, doi:10.1016/j.chemphyslip.2018.09.002.
15. Sepčić, K.; Berne, S.; Rebolj, K.; Batista, U.; Plemenitaš, A.; Šentjerc, M.; Maček, P. Ostreolysin, a pore-forming protein from the oyster mushroom, interacts specifically with membrane cholesterol-rich lipid domains. *FEBS Lett.* **2004**, *575*, 81–85, doi:10.1016/j.febslet.2004.07.093.
16. Berne, S.; Lah, L.; Sepčić, K. Aegerolysins: structure, function, and putative biological role. *Protein Sci.* **2009**, *18*, 694–706, doi:10.1002/pro.85.
17. Ota, K.; Butala, M.; Viero, G.; Dalla Serra, M.; Sepčić, K.; Maček, P. Fungal MACPF-Like Proteins and Aegerolysins: Bi-component Pore-Forming Proteins? In: 2014; pp. 271–291.
18. Skočaj, M.; Yu, Y.; Grundner, M.; Resnik, N.; Bedina Zavec, A.; Leonardi, A.; Križaj, I.; Guella, G.; Maček, P.; Kreft, M.E.; et al. Characterisation of plasmalemmal shedding of vesicles induced by the cholesterol/sphingomyelin binding protein, ostreolysin A-mCherry. *Biochim. Biophys. Acta - Biomembr.* **2016**, *1858*, 2882–2893, doi:10.1016/j.bbamem.2016.08.015.
19. Novak, M.; Krpan, T.; Panevska, A.; Shewell, L.K.; Day, C.J.; Jennings, M.P.; Guella, G.; Sepčić, K. Binding specificity of ostreolysin A6 towards Sf9 insect cell lipids. *Biochim. Biophys. Acta - Biomembr.* **2020**, *1862*, 183307, doi:10.1016/j.bbamem.2020.183307.
20. Berne, S.; Križaj, I.; Pohleven, F.; Turk, T.; Maček, P.; Sepčić, K. Pleurotus and Agrocybe hemolysins, new proteins hypothetically involved in fungal fruiting. *Biochim. Biophys. Acta* **2002**, *1570*, 153–159, doi:10.1016/S0304-4165(02)00190-3.
21. Ngai, P.H.K.; Ng, T.B. A hemolysin from the mushroom *Pleurotus eryngii*. *Appl. Microbiol. Biotechnol.* **2006**, *72*, 1185–1191, doi:10.1007/s00253-006-0406-6.
22. Novak, M.; Kraševac, N.; Skočaj, M.; Maček, P.; Anderluh, G.; Sepčić, K. Fungal aegerolysin-like proteins: distribution, activities, and applications. *Appl. Microbiol. Biotechnol.* **2015**, *99*, 601–610, doi:10.1007/s00253-014-6239-9.
23. Butala, M.; Novak, M.; Kraševac, N.; Skočaj, M.; Veranič, P.; Maček, P.; Sepčić, K. Aegerolysins: Lipid-binding proteins with versatile functions. *Semin. Cell Dev. Biol.* **2017**, *72*, 142–151, doi:10.1016/j.semcdb.2017.05.002.
24. Bhat, H.B.; Ishitsuka, R.; Inaba, T.; Murate, M.; Abe, M.; Makino, A.; Kohyama-Koganeya, A.; Nagao, K.; Kurahashi, A.; Kishimoto, T.; et al. Evaluation of aegerolysins as novel tools to detect and visualize ceramide phosphoethanolamine, a major sphingolipid in invertebrates. *FASEB J.* **2015**, *29*, 3920–3934, doi:10.1096/fj.15-272112.
25. Wartenberg, D.; Lapp, K.; Jacobsen, I.D.; Dahse, H.-M.; Knemeyer, O.; Heinekamp, T.; Brakhage, A.A. Secretome analysis of *Aspergillus fumigatus* reveals Asp-hemolysin as a major secreted protein. *Int. J. Med. Microbiol.* **2011**, *301*, 602–611, doi:10.1016/j.ijmm.2011.04.016.
26. Yap, H.-Y.Y.; Fung, S.-Y.; Ng, S.-T.; Tan, C.-S.; Tan, N.-H. Genome-based Proteomic Analysis of *Lignosus rhinocerotis* (Cooke) Ryvarden Sclerotium. *Int. J. Med. Sci.* **2015**, *12*, 23–31, doi:10.7150/ijms.10019.
27. Dubey, M.; Jensen, D.F.; Karlsson, M. Functional characterization of the AGL1 aegerolysin in the mycoparasitic fungus *Trichoderma atroviride* reveals a role in conidiation and antagonism. *Mol. Genet. Genomics* **2021**, *296*, 131–140, doi:10.1007/s00438-020-01732-3.
28. Zhang, S.; Clark, K.D.; Strand, M.R. The protein P23 identifies capsule-forming plasmatocytes in the moth *Pseudoplusia includens*. *Dev. Comp. Immunol.* **2011**, *35*, 501–510, doi:10.1016/j.dci.2010.12.006.
29. Kelker, M.S.; Berry, C.; Evans, S.L.; Pai, R.; McCaskill, D.G.; Wang, N.X.; Russell, J.C.; Baker, M.D.; Yang, C.; Pflugrath, J.W.; et al. Structural and Biophysical Characterization of *Bacillus thuringiensis* Insecticidal Proteins Cry34Ab1 and Cry35Ab1. *PLoS One* **2014**, *9*, e112555, doi:10.1371/journal.pone.0112555.
30. Juntjes, P.; Rebolj, K.; Sepčić, K.; Maček, P.; Cecilija Žužek, M.; Cestnik, V.; Frangež, R. Ostreolysin induces sustained contraction of porcine coronary arteries and endothelial dysfunction in middle- and large-sized vessels. *Toxicon* **2009**, *54*, 784–792, doi:10.1016/j.toxicon.2009.06.005.
31. Panevska, A.; Skočaj, M.; Modic, Š.; Razinger, J.; Sepčić, K. Aegerolysins from the fungal genus *Pleurotus* – Bioinsecticidal proteins with multiple potential applications. *J. Invertebr. Pathol.* **2021**, *186*, 107474, doi:10.1016/j.jip.2020.107474.
32. Rebolj, K.; Sepčić, K. Ostreolysin, a Cytolytic Protein from Culinary-Medicinal Oyster Mushroom *Pleurotus ostreatus* (Jacq.: Fr.) P. Kumm. (Agaricomycetidae), and Its Potential Use in Medicine and Biotechnology. *Int. J. Med. Mushrooms* **2008**, *10*, 293–302, doi:10.1615/IntJMedMushr.v10.i4.10.
33. Kraševac, N.; Novak, M.; Barat, S.; Skočaj, M.; Sepčić, K.; Anderluh, G. Unconventional Secretion of Nigerolysins A from *Aspergillus* Species. *Microorganisms* **2020**, *8*, 1973, doi:10.3390/microorganisms8121973.
34. Roberts, R.G.; Bischoff, J.F.; Raymond, S.T. Differential gene expression in *Alternaria gaisen* exposed to dark and light. *Mycol. Prog.* **2011**, *11*, 373–382, doi:10.1007/s11557-011-0752-3.
35. Kočar, E.; Lenarčič, T.; Hodnik, V.; Panevska, A.; Huang, Y.; Bajc, G.; Kostanjšek, R.; Naren, A.P.; Maček, P.; Anderluh, G.; et al. Crystal structure of RahU, an aegerolysin protein from the human pathogen *Pseudomonas aeruginosa*, and its interaction with membrane ceramide phosphorylethanolamine. *Sci. Rep.* **2021**, *11*, 6572, doi:10.1038/s41598-021-85956-2.
36. Panevska, A.; Hodnik, V.; Skočaj, M.; Novak, M.; Modic, Š.; Pavlic, I.; Podržaj, S.; Zarić, M.; Resnik, N.; Maček, P.; et al. Pore-forming protein complexes from *Pleurotus* mushrooms kill western corn rootworm and Colorado potato beetle through targeting membrane ceramide phosphoethanolamine. *Sci. Rep.* **2019**, *9*, 5073, doi:10.1038/s41598-019-

37. Milijaš Jotić, M.; Panevska, A.; Iacovache, I.; Kostanjšek, R.; Mravinec, M.; Skočaj, M.; Zuber, B.; Pavšič, A.; Razinger, J.; Modic, Š.; et al. Dissecting Out the Molecular Mechanism of Insecticidal Activity of Ostreolysin A6/Pleurotolysin B Complexes on Western Corn Rootworm. *Toxins (Basel)*. **2021**, *13*, 455, doi:10.3390/toxins13070455.
38. Kraševac, N.; Panevska, A.; Lemež, Š.; Razinger, J.; Sepčić, K.; Anderluh, G.; Podobnik, M. Lipid-Binding Aegerolysin from Biocontrol Fungus *Beauveria bassiana*. *Toxins (Basel)*. **2021**, *13*, 820, doi:10.3390/toxins13110820.
39. Panevska, A.; Glavan, G.; Jemec Kokalj, A.; Kukuljan, V.; Trobec, T.; Žužek, M.C.; Vrecl, M.; Drobne, D.; Frangež, R.; Sepčić, K. Effects of Bioinsecticidal Aegerolysin-Based Cytolytic Complexes on Non-Target Organisms. *Toxins (Basel)*. **2021**, *13*, 457, doi:10.3390/toxins13070457.
40. Scopus Search Available online: <https://www.scopus.com/search/form.uri?display=basic> (accessed on May 9, 2022).
41. Momany, M.; Jason, S. Women researchers in fungi & oomycetes Available online: <http://fungalgenomes.org/blog/wrifo/> (accessed on Jan 17, 2020).
42. Tagul word cloud art creator Available online: <https://wordart.com/> (accessed on Mar 13, 2020).
43. The 28th Fungal Genetics Conference at Asilomar, March 17-22, 2015, Program book Available online: <https://www2.genetics-gsa.org/fungal/2015/index.shtml> (accessed on Apr 20, 2022).
44. The 13th European Conference on Fungal Genetics Paris, France, April 3-6, 2016, Abstracts Book Available online: [https://hal.inrae.fr/hal-02792296/file/2016-1\\_1.pdf](https://hal.inrae.fr/hal-02792296/file/2016-1_1.pdf) (accessed on Apr 20, 2022).
45. The 15th European Conference on Fungal Genetics Rome, Italy, February 17-20, 2020, Conference Abstracts Book Available online: <https://www.ecfg15.org/> (accessed on Apr 22, 2022).
46. The 31st Fungal Genetics Conference at Asilomar, March 15 - 20, 2022, Program Book Available online: <https://genetics-gsa.org/fungal-2022/program-and-abstract-books/> (accessed on Apr 20, 2022).
